# Supplementary material
Source: Springer Nature journal article supplement (https://www.springermedizin.de/resource/supplementary/12874_2009_383_MOESM5_ESM.pdf/9434358)
Supplement: MOESM5 [file 9434358]

Journals registered in the Scopus™ database [13]

Step 1

Journal selection based on keywords (A–E) and professional judgment (F)

**A** **Keywords\***  
**in infectious disease name:**  
*AIDS<sup>†</sup>, HIV<sup>†</sup>, tuberculosis,  
malaria, leprosy, mycoses,  
viral hepatitis*

**B** **Keywords**  
**directly included in**  
**infectious diseases:**  
*infection, infectious disease(s),  
communicable disease(s),  
transmissible disease(s),  
emerging infectious disease(s),  
sexually transmitted disease(s),  
zoonoses, zoonotic disease(s),  
vector-borne disease(s)*

**C** **Keywords**  
**in clinical microbiology:**  
*clinical or medical or  
diagnostic & microbiology or  
bacteriology or virology or  
parasitology or mycology*

**D** **Keywords**  
**in anti-microbial drugs:**  
*antibacterial, antiviral,  
antimicrobial, microbial drug  
resistance, vaccine,  
antibiotic, biological*

**E** **Keywords**  
**of developing techniques for**  
**infectious disease control:**  
*microbiological or virological or  
bacteriological & methods*

**F** **Selection**  
**of public health**  
**journals that**  
**target infectious**  
**diseases in view**  
**of aim & scope of**  
**journals**

Step 2

Infectious disease journals (initial selection)

Journals in which original or review articles are included in PubMed database from 2006  
(articles published in 2007 can be seen in the database)

Infectious disease journals (final selection)

Step 3

Survey of the number of articles in journals per publication year and Asian country where the first author of the article originated, by PubMed search engine

Step 4

Analysis of Asian publications

Step 5
